# Supplementary figures and images for: South Asia’s sustained financial development and the role of remittance: An empirical analysis
Source: Research Square preprint supplement (doi:10.21203/rs.3.rs-1715873/v1), 2022-06-17

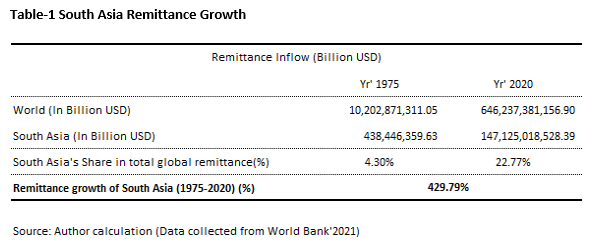


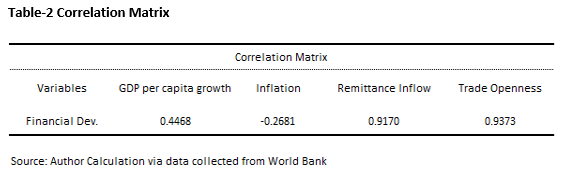

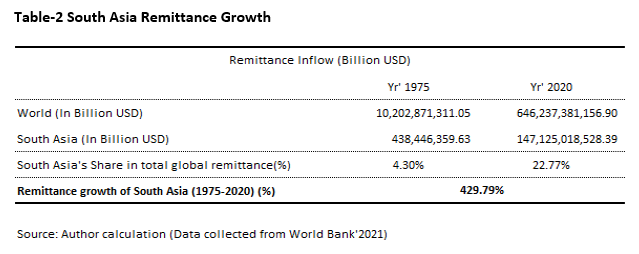

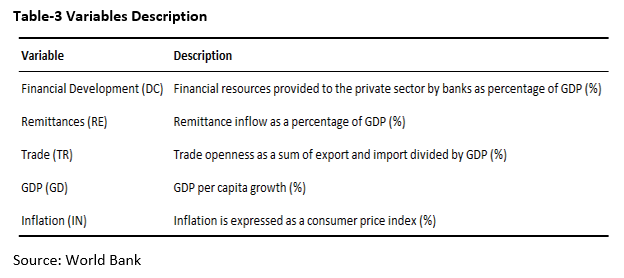

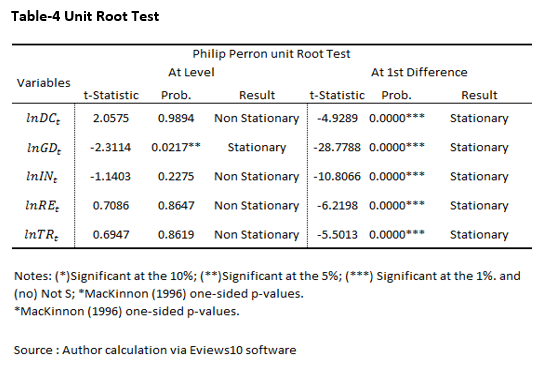

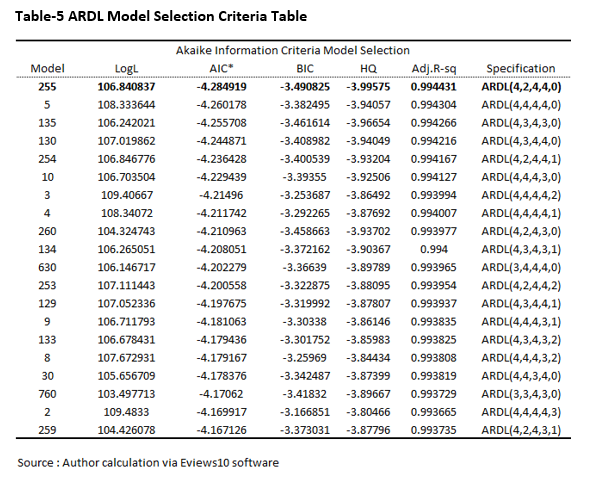

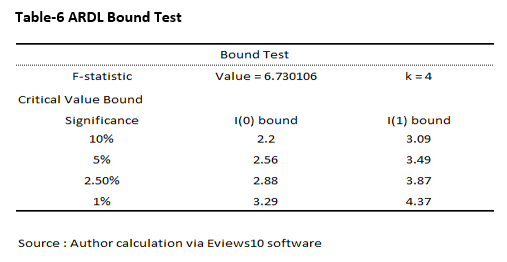

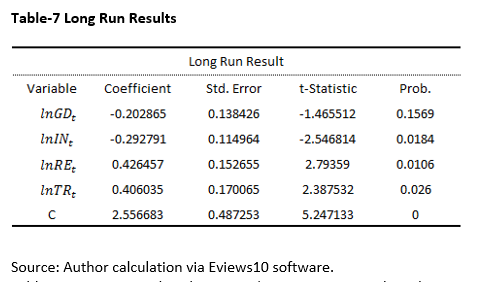

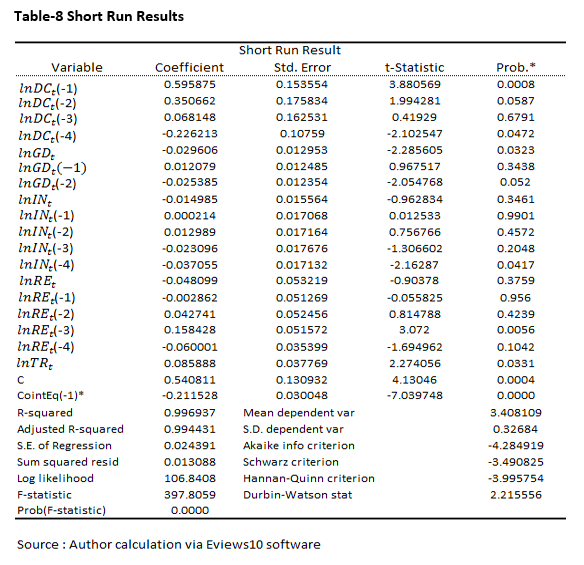

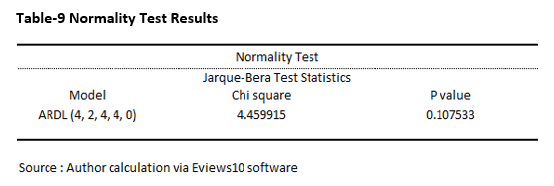

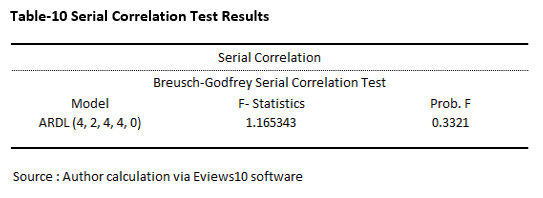

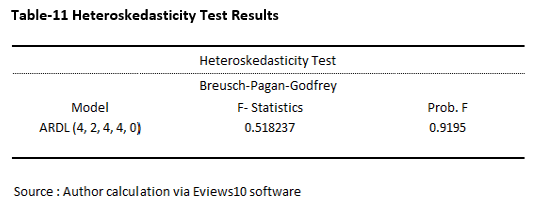

Supplement: Supplementary file 1 [file 6972f5d328b422f5a5e139ba.docx]
